# Supplementary material for: Selectively instant-response nanofibers with a fluorescent chemosensor toward phosgene in gas phase
Source: Royal Society of Chemistry journal article supplement (doi:10.1039/c8tc05281f), 2019-01-01
Supplement: c8tc05281f1.pdf [file c8tc05281f1.pdf]

Electronic Supplementary Information (ESI)

## Selectively Instant-Response Nanofibers with a Fluorescent Chemosensor toward Phosgene in Gas Phase

*Shao-Lin Wang,<sup>a</sup> Chuan-Ling Zhang<sup>b</sup> and Qin-Hua Song<sup>\*a</sup>*

<sup>a</sup> Department of Chemistry, University of Science and Technology of China, Hefei 230026, P. R. China. <sup>b</sup> Anhui Province Key Laboratory of Advanced Catalytic Materials and Reaction Engineering, Department of Material Science and Engineering, Hefei University of Technology, Hefei, Anhui 230026, P. R. China.

### Contents:

|                                                                                     |      |
|-------------------------------------------------------------------------------------|------|
| 1. Summary of fluorescent chemosensors for phosgene and its substitutes.....        | S2-4 |
| 2. Spectral response of compound <b>2</b> to phosgene.....                          | S5   |
| 3. Photostability of Phos-3 and its sensing product.....                            | S5   |
| 4. HRMS Evidence for the Sensing Mechanism .....                                    | S6   |
| 5. SEM photos of the morphology of Phos-3-embedded nanofibers.....                  | S6   |
| 6. Copies for NMR spectra of compound <b>2</b> , Phos-3 and compound <b>3</b> ..... | S7-9 |

**1. Table S1. Summary of fluorescent chemosensors for phosgene and its substitutes**

| Entry | structures                                                                          | LOD in solutions                                                                  | Response Time                                                                   |                                                                              | References                                        |
|-------|-------------------------------------------------------------------------------------|-----------------------------------------------------------------------------------|---------------------------------------------------------------------------------|------------------------------------------------------------------------------|---------------------------------------------------|
|       |                                                                                     |                                                                                   | in solutions                                                                    | gaseous phosgene                                                             |                                                   |
| 1     | 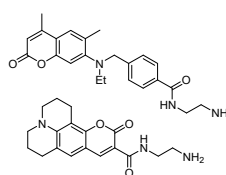   | 50 mM (phosgene)                                                                  | --                                                                              | --                                                                           | Chem. Commun. 2007, 1238-1239.                    |
| 2     |    | 50 nM (triphosgene)                                                               | 1 μM triphosgene<br>seconds                                                     | 0~2×10 <sup>4</sup> ppm, 20~30 s<br>(take photos)                            | Chem. Commun. 2012, 48, 1895-1897.                |
| 3     |    | 1 nM (phosgene)                                                                   | --                                                                              | --                                                                           | Anal. Chem. 2012, 84, 4594-4597.                  |
| 4     |    | 20 nM (triphosgene)                                                               | 20 μM triphosgene<br>2 min                                                      | 0~20 ppm, seconds<br>(take photos)                                           | Angew. Chem. Int. Ed. 2016, 55, 4729-4733.        |
| 5     |   | NBD-OPD, 7 nM (phosgene)<br>RB-OPD, 28 nM (phosgene)<br>NAP-OPD, 28 nM (phosgene) | 8 μM triphosgene, 3 min<br>10 μM triphosgene, 2 min<br>12 μM triphosgene, 1 min | 0~200 ppm, 10 min<br>0~200 ppm, 10 min<br>0~2000 ppm, 5 min<br>(take photos) | ACS Appl. Mater. Interfaces 2016, 8, 22246-22252. |
| 6     |  | 3 nM (triphosgene)                                                                | 50 μM triphosgene<br>20 s                                                       | 0~40 ppm, 5 min<br>(take photos)                                             | ACS Sens. 2017, 2, 178-182.                       |

|    |                                                                                     |                                             |                                  |                                                    |                                                      |
|----|-------------------------------------------------------------------------------------|---------------------------------------------|----------------------------------|----------------------------------------------------|------------------------------------------------------|
| 7  | 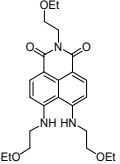   | 1.3 nM (triphosgene)                        | 25 $\mu$ M triphosgene<br>20 min | 0~1000 ppm, 10 min<br>(take photos)                | Chem. Commun. 2017, 53,<br>1530-1533.                |
| 8  |    | 2.7 nM (triphosgene)                        | 40 $\mu$ M triphosgene<br>15 s   | 0~80 ppm, 5 min<br>(take photos)                   | Anal. Chem. 2017, 89,<br>4192-4197.                  |
| 9  |    | 0.04 nM (triphosgene)                       | 6 $\mu$ M triphosgene<br>1.5 s   | 0~0.5 ppm, 1 min<br>(take photos)                  | ACS Appl. Mater. Interfaces<br>2017, 9, 13920-13927. |
| 10 |    | 0.31 nM (triphosgene)                       | 50 $\mu$ M triphosgene<br>10 s   | 0~20 ppm, 0.5 min<br>(take photos)                 | Anal. Chem. 2017, 89,<br>12837-12842.                |
| 11 |    | 20 nM (phosgene)                            | 50 $\mu$ M triphosgene<br>20 min | 0~50 ppm, 5 min<br>(take photos)                   | Org. Chem. Front. 2017, 4,<br>1719-1725.             |
| 12 |   | --                                          | --                               | 64 ppm, 1 min<br>(fluorescence change)             | Chem. Commun. 2017, 53,<br>9813-9816.                |
| 13 |  | 1.4 nM (triphosgene)                        | 6 $\mu$ M triphosgene<br>4 min   | 0~1000 ppm, 10 min<br>(take photos)                | Anal. Chem. 2017, 89,<br>12596-12601.                |
| 14 |  | 0.2 nM (triphosgene)<br>0.7 nM (diphosgene) | 20 $\mu$ M diphosgene<br>10 min  | 20 ppm (diphosgene), 30 s<br>(fluorescence change) | Chem. Eur. J. 2018, 24,<br>5652-5658.                |

|    |                                                                                     |                      |                                 |                                       |                                            |
|----|-------------------------------------------------------------------------------------|----------------------|---------------------------------|---------------------------------------|--------------------------------------------|
| 15 | 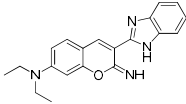   | 27 nM (phosgene)     | 12 $\mu$ M triphosgene<br>2 min | 0~500 ppm, 10 min<br>(take photos)    | Anal. Chim. Acta 2018, 1029,<br>97-103.    |
| 16 |    | 32 nM (phosgene)     | 5 $\mu$ M triphosgene<br>2 min  | 0~200 ppm<br>--                       | Anal. Chem. 2018, 90,<br>3382-3386.        |
| 17 |    | 179 nM (triphosgene) | 50 $\mu$ M triphosgene<br>30 s  | 50 ppm, 20 s<br>(fluorescence change) | Chem. Eur. J. 2018, 24,<br>3136-3140.      |
| 18 |    | 2.3 nM (phosgene)    | 20 $\mu$ M triphosgene<br>5 min | 0~100 ppm, 5 min<br>(take photos)     | Anal. Chem. 2018, 90,<br>8686-8691.        |
| 19 |    | 8.9 nM (triphosgene) | 20 $\mu$ M triphosgene<br>4 min | 0~500 ppm, 5 min<br>(take photos)     | J. Mater. Chem. C<br>2018, 6, 10472-10479. |
| 20 |  | 0.3 nM (triphosgene) | 30 $\mu$ M triphosgene<br>60 s  | 40 ppm<br>Instant (<< 1 s)<br>(video) | This work                                  |

“--” Not reported.

## 2. The spectral response of compound 2 to phosgene

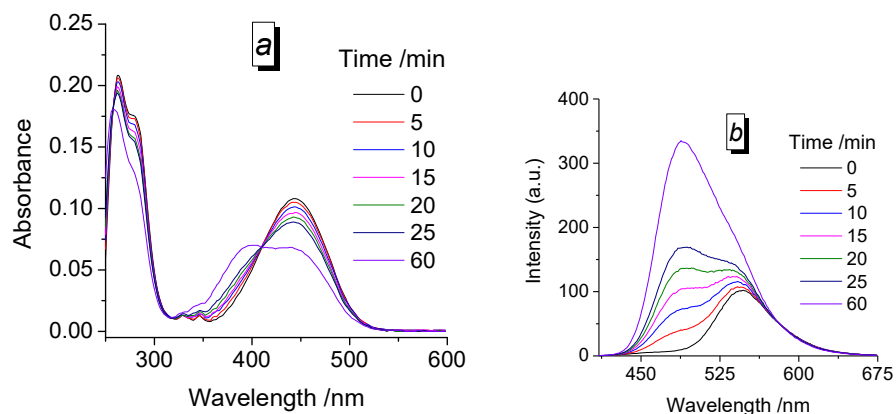

**Figure S1.** Time-dependent UV/vis absorption (a) and fluorescence (b) spectra of compound **2** (10 μM) in CH<sub>3</sub>CN upon addition of triphosgene (30 μM)/Et<sub>3</sub>N (300 μM),  $\lambda_{\text{ex}} = 400$  nm.

## 3. Photostability of Phos-3 and its sensing product

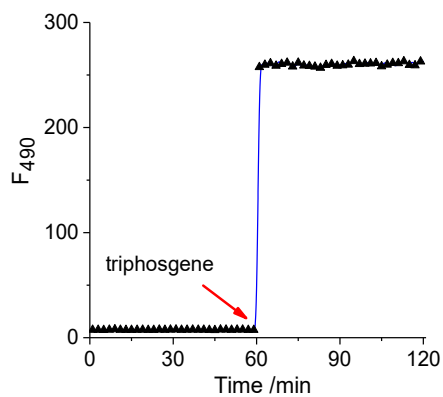

**Figure S2.** Time-dependent fluorescence intensity at 490 nm of 10 μM Phos-3 in CH<sub>3</sub>CN containing Et<sub>3</sub>N (0.5 mM) before and after addition of triphosgene (20 μM).  $\lambda_{\text{ex}} = 430$  nm.

#### 4. HRMS Evidence for the Sensing Mechanism

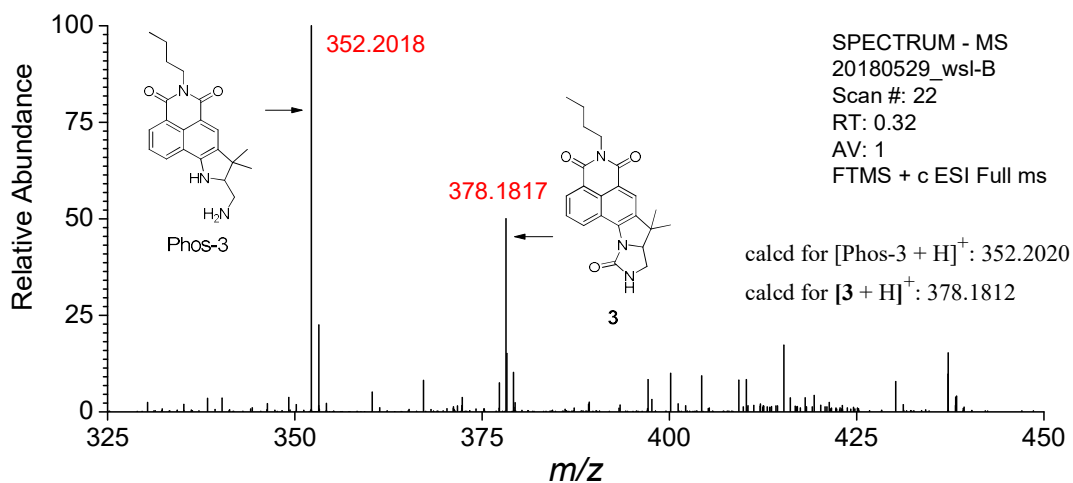

**Figure S3.** HRMS for the reaction mixture of Phos-3 with triphosgene in Et<sub>3</sub>N/CH<sub>3</sub>CN solution.

#### 5. Preparation of Phos-3-Embedded Electrospun Fibers

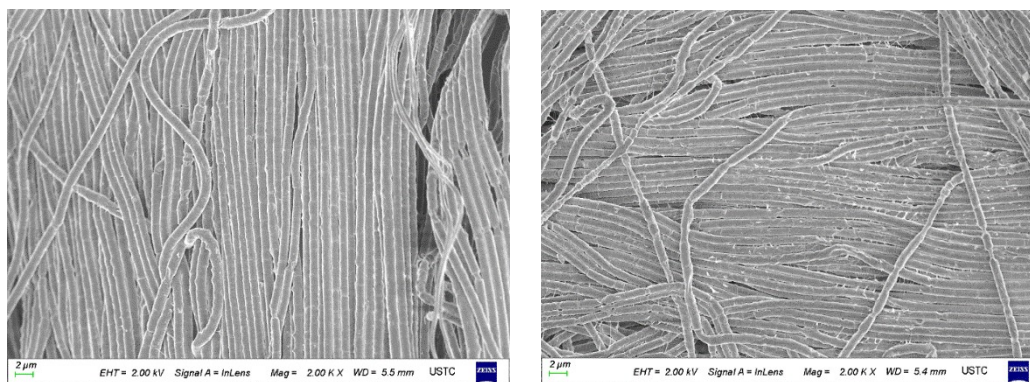

**Figure S4.** Scanning electron microscope images of Phos-3-embedded fibers before (left) and after (right) exposure to phosgene.

## 6. Copies for NMR spectra of Compound 2, Phos-3 and Compound 3

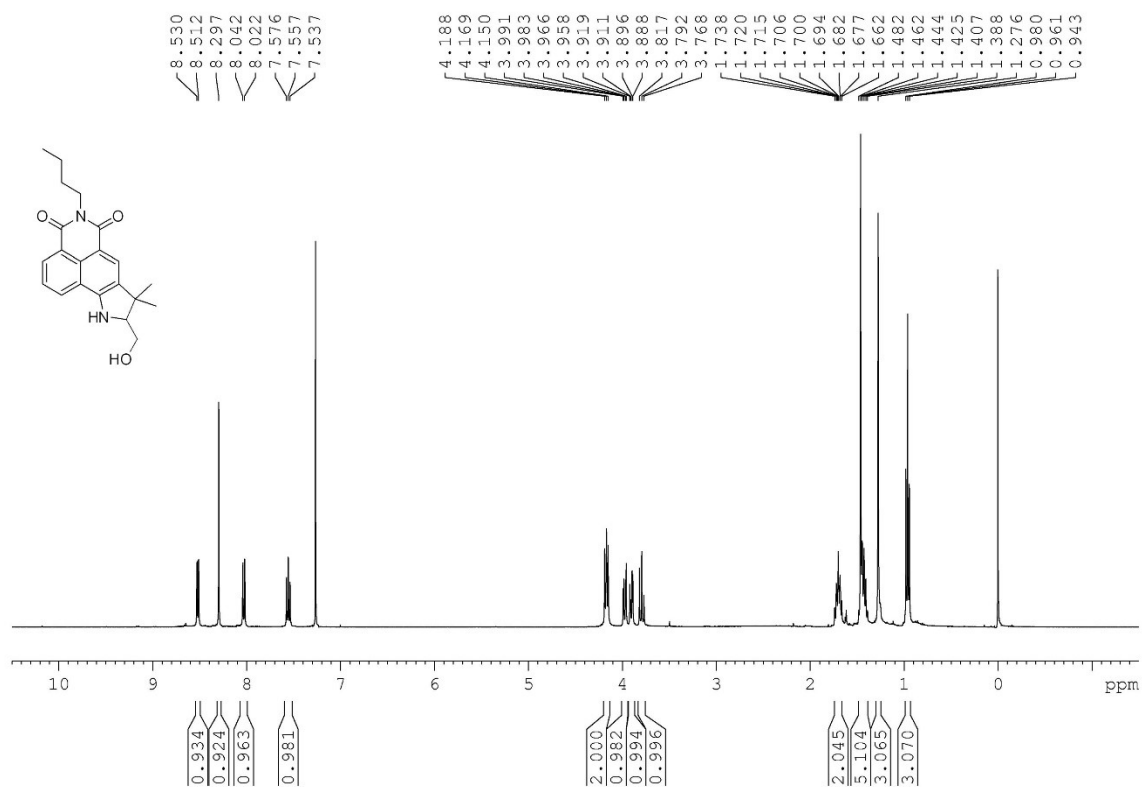

<sup>1</sup>H NMR for compound 2 in CDCl<sub>3</sub>

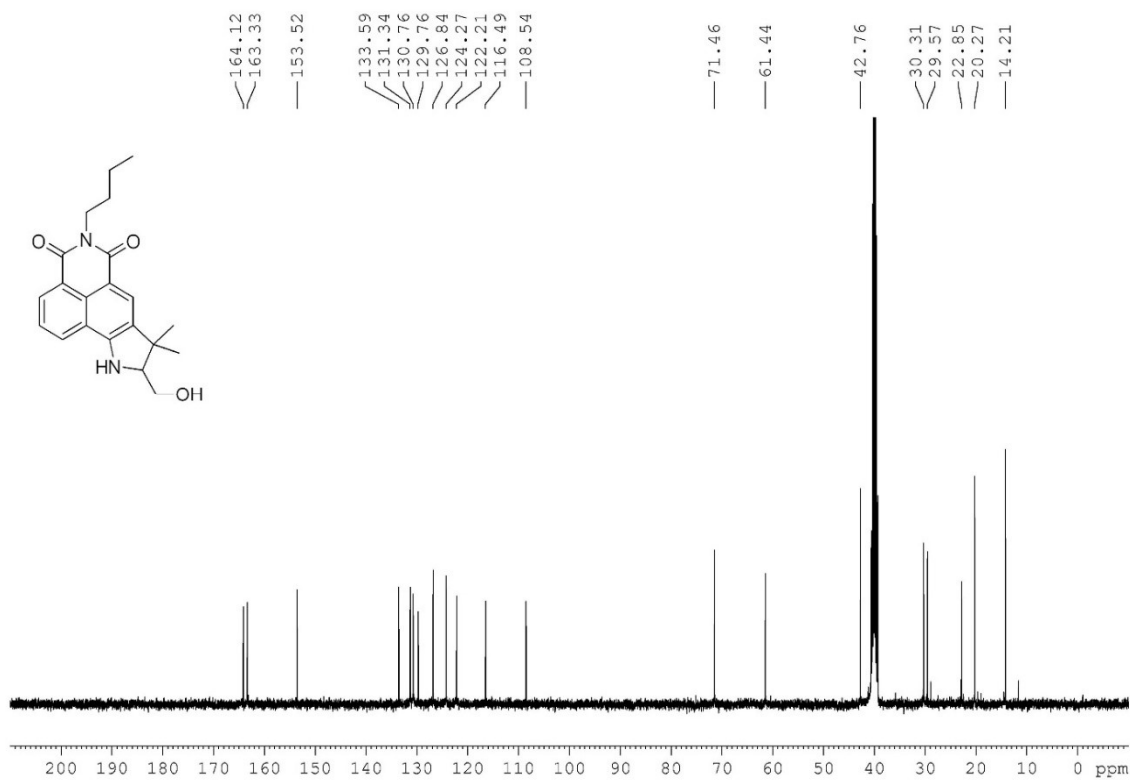

<sup>13</sup>C NMR for compound 2 in DMSO-*d*<sub>6</sub>

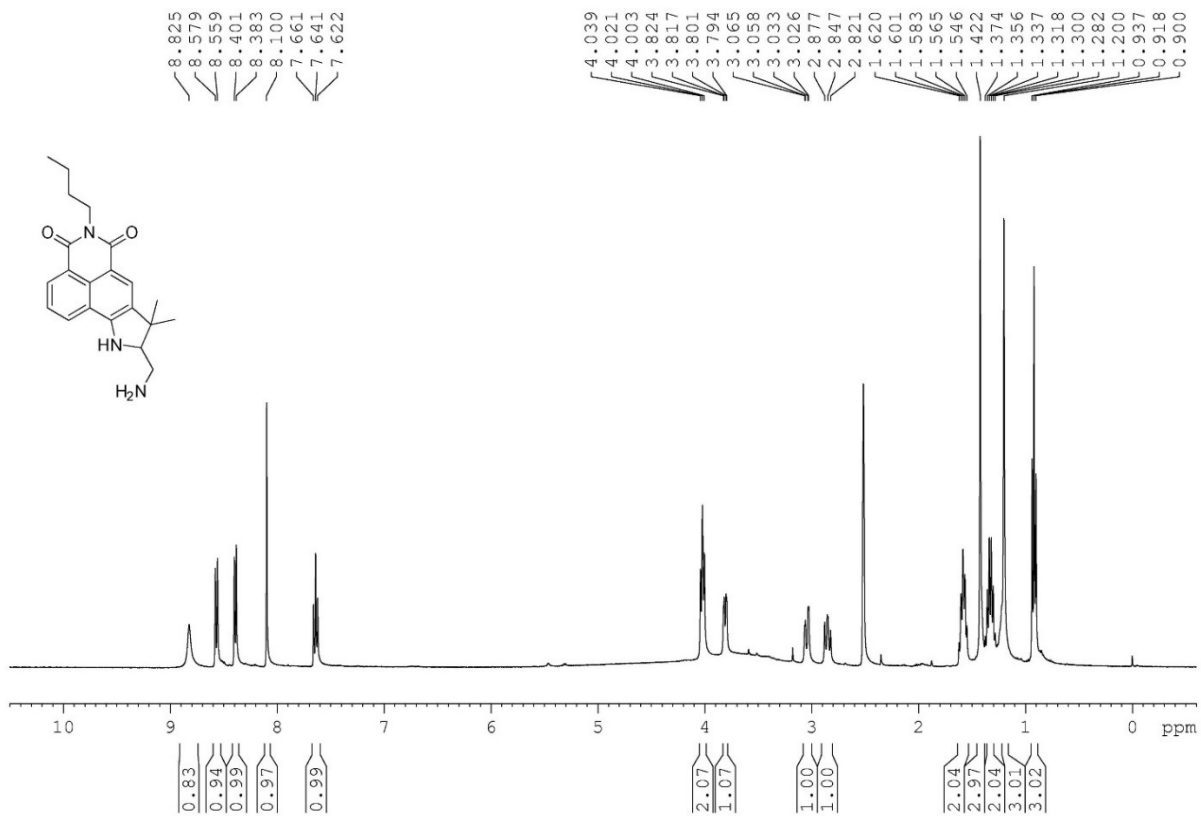

<sup>1</sup>H NMR for Phos-3 in DMSO-*d*<sub>6</sub>

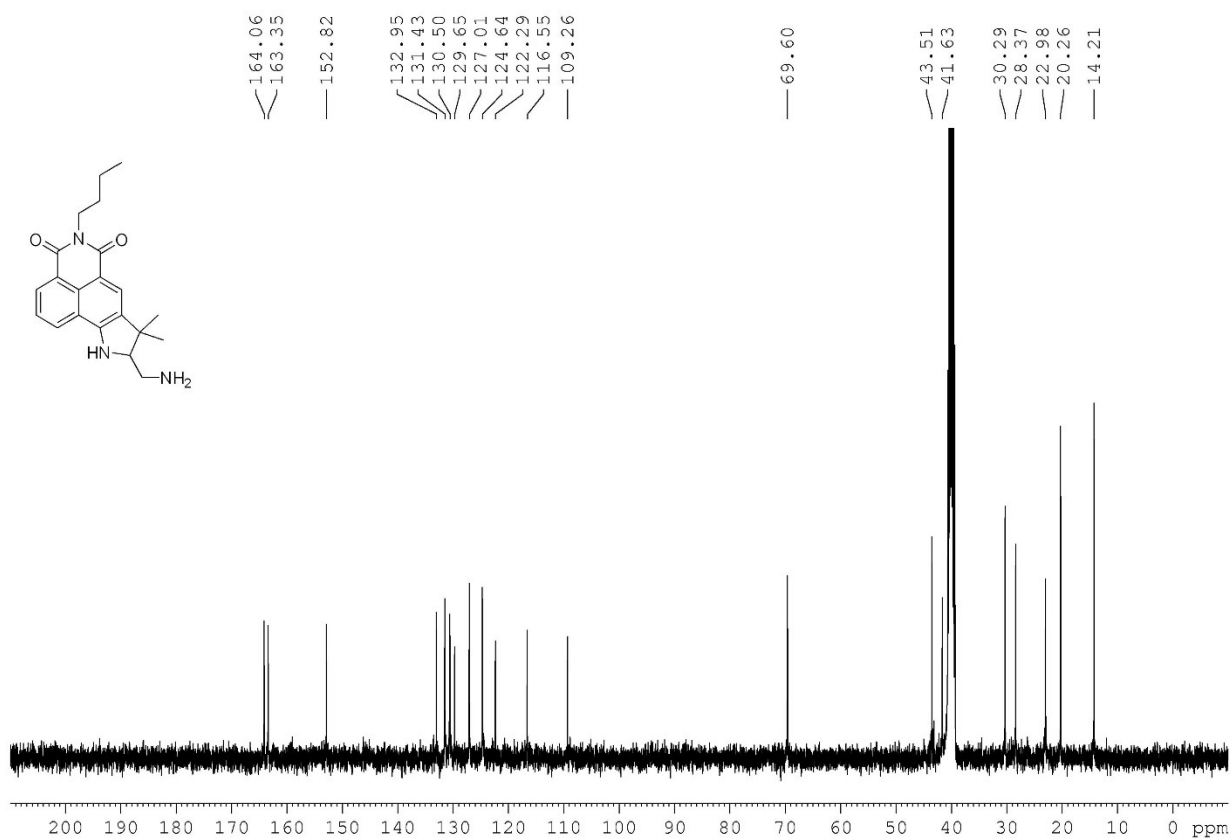

<sup>13</sup>C NMR for Phos-3 in DMSO-*d*<sub>6</sub>



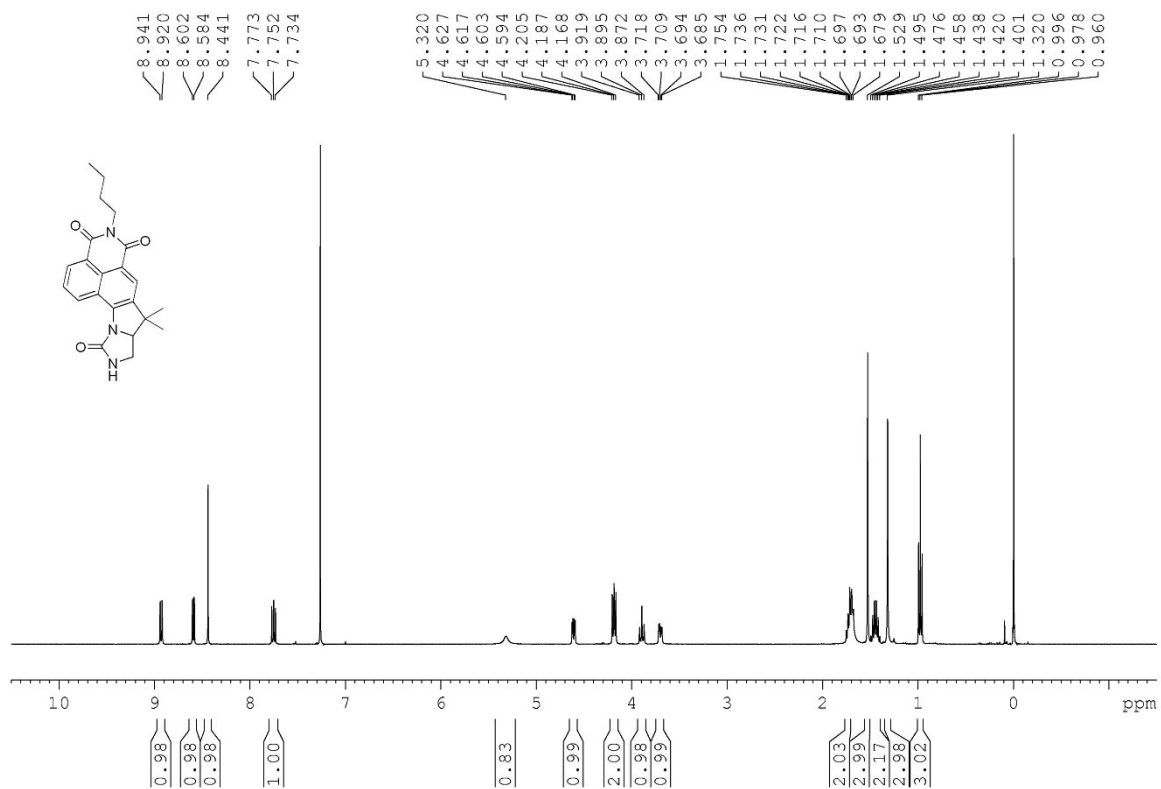

<sup>1</sup>H NMR for compound **3** in CDCl<sub>3</sub>

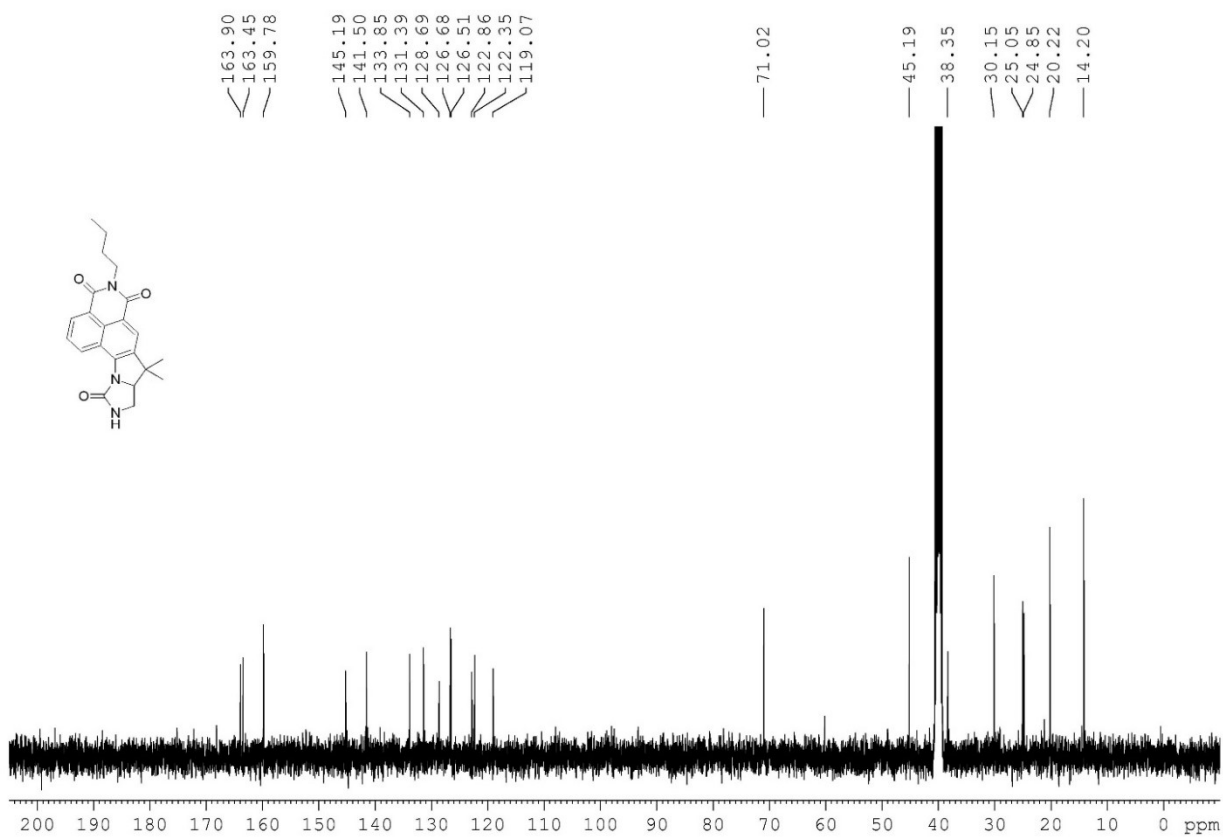

<sup>13</sup>C NMR for compound **3** in DMSO-*d*<sub>6</sub>
